RESEARCH ARTICLE

# Plumbagin Suppresses the Invasion of HER2-Overexpressing Breast Cancer Cells through Inhibition of IKK $\alpha$ -Mediated NF- $\kappa$ B Activation

Anna Kawiak<sup>1,2\*</sup>, Anna Domachowska<sup>1</sup>

**1** Department of Biotechnology, Intercollegiate Faculty of Biotechnology, University of Gdansk & Medical University of Gdansk, Gdansk, Poland, **2** Laboratory of Human Physiology, Faculty of Health Sciences with Subfaculty of Nursing, Medical University of Gdansk, Gdansk, Poland

\* [anna.kawiak@biotech.ug.edu.pl](mailto:anna.kawiak@biotech.ug.edu.pl)

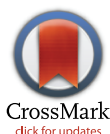

## OPEN ACCESS

**Citation:** Kawiak A, Domachowska A (2016) Plumbagin Suppresses the Invasion of HER2-Overexpressing Breast Cancer Cells through Inhibition of IKK $\alpha$ -Mediated NF- $\kappa$ B Activation. PLoS ONE 11(10): e0164064. doi:10.1371/journal.pone.0164064

**Editor:** Jian Jian Li, University of California Davis, UNITED STATES

**Received:** June 23, 2016

**Accepted:** September 19, 2016

**Published:** October 11, 2016

**Copyright:** © 2016 Kawiak, Domachowska. This is an open access article distributed under the terms of the [Creative Commons Attribution License](https://creativecommons.org/licenses/by/4.0/), which permits unrestricted use, distribution, and reproduction in any medium, provided the original author and source are credited.

**Data Availability Statement:** All relevant data are within the paper.

**Funding:** This work was supported were supported by grant no. Lider/15/217/L-3/11/NCBR/2012 from the National Centre for Research and Development (<https://www.ncbr.gov.pl>), funding received by AK. Cost of open access publication supported from the project MOBI4Health that has received funding from the European Union's Seventh Framework Programme for research, technological development and demonstration under grant agreement no. 316094 and from the Polish

## Abstract

HER2-overexpressing breast cancers account for about 30% of breast cancer occurrences and have been correlated with increased tumor aggressiveness and invasiveness. The nuclear factor- $\kappa$ B (NF- $\kappa$ B) is overexpressed in a subset of HER2-positive breast cancers and its upregulation has been associated with the metastatic potential of HER2-overexpressing tumors. The present study aimed at determining the potential of plumbagin, a naturally occurring naphthoquinone, to inhibit the invasion of HER2-overexpressing breast cancer cells and determine the involvement of NF- $\kappa$ B inhibition in plumbagin-mediated cell invasion suppression. In the present research we showed that plumbagin inhibited the transcriptional activity of NF- $\kappa$ B in HER2-positive breast cancer cells. The suppression of NF- $\kappa$ B activation corresponded with the inhibition of NF- $\kappa$ B p65 phosphorylation and downregulation of NF- $\kappa$ B-regulated matrix metalloproteinase 9 (MMP-9) expression. Plumbagin suppressed the invasion of HER2-overexpressing breast cancer cells and the inhibition of cell invasion was associated with the ability of plumbagin to inhibit NF- $\kappa$ B transcriptional activity. The silencing of NF- $\kappa$ B p65 increased the sensitivity of HER2-overexpressing breast cancer cells to plumbagin-induced cell invasion inhibition. NF- $\kappa$ B inhibition was associated with I $\kappa$ B kinase  $\alpha$  (IKK $\alpha$ ) activity suppression and inhibition of I $\kappa$ B $\alpha$  phosphorylation and degradation. The knockdown of IKK $\alpha$  resulted in increased sensitivity of HER2-positive cells to plumbagin-induced suppression of NF- $\kappa$ B transcriptional activity and expression of MMP-9. In conclusion, plumbagin inhibits the invasion of HER2-overexpressing breast cancer cells through the inhibition of IKK $\alpha$ -mediated NF- $\kappa$ B activation and downregulation of NF- $\kappa$ B-regulated MMP-9 expression.

## Introduction

HER2 is a proto-oncogene which encodes a transmembrane tyrosine kinase. HER2 is frequently overexpressed or amplified in various types of human cancers, including breast cancer. Overexpression of the HER2 protein and/or amplification of the *HER2* gene occurs in approximately

Ministry of Science and Higher Education within the programme for international co-funded projects.

**Competing Interests:** The authors have declared that no competing interests exist.

30% of breast cancer incidents and is associated with the development of chemoresistance, increased metastatic potential and poor prognosis [1]. Therapeutic strategies used for HER2-overexpressing breast cancers involve targeting the HER2 receptor and include the application of monoclonal antibodies (e.g. trastuzumab) and tyrosine kinase inhibitors (e.g. lapatinib). Despite the advances in HER2-targeted therapy, not all patients respond to therapy and the development of therapeutic resistance remains a persistent clinical problem [2]. Recently, nuclear factor- $\kappa$ B (NF- $\kappa$ B) upregulation has been correlated with the increased invasive potential of HER2-overexpressing breast cancer cells. NF- $\kappa$ B is overexpressed in a subset of HER2-positive breast cancers and regulates the expression of target genes involved in migration and invasion of cancer cells [3]. The inhibition of NF- $\kappa$ B activity has been shown to increase the efficacy of HER2-overexpressing breast cancer treatment [4] and abrogate breast cancer metastasis *in vivo* [5]. Thus the search for effective agents that target NF- $\kappa$ B in HER2-overexpressing breast cancer cells is warranted in order to achieve long-term inhibition of HER2-overexpressing tumors.

Plumbagin (5-hydroxy-2-methyl-1,4-naphthoquinone) is a naphthoquinone constituent of plants of the genus *Drosera* and *Plumbago* [6],[7]. Due to its high antiproliferative activity towards various cancer cell lines and anti-cancer activity displayed *in vivo*, plumbagin is gaining increasing interest [8]-[9]. In particular, research has pointed to the promising potential of plumbagin in breast cancer therapy [10]-[11]. *In vivo* studies have shown that plumbagin reduces tumor growth by 70% in MDA-MB-231 mouse tumor xenografts without toxic side-effects [12]. The ability of plumbagin to inhibit migration and invasion of breast cancer cells has been demonstrated in *in vitro* and *in vivo* studies. These studies have mainly examined the influence of plumbagin towards triple negative breast cancer cells and have linked plumbagin-mediated inhibition of breast cancer cell migration and invasion with STAT3 signaling inhibition [13] and CXCR4 expression downregulation [12]. The promoter of the CXCR4 chemokine receptor contains several NF- $\kappa$ B binding sites and plumbagin was found to inhibit the binding of NF- $\kappa$ B to this region. Furthermore, the ability of plumbagin to inhibit the expression of osteoclast-activating factors in triple negative breast cancer cells was linked with its ability to inhibit NF- $\kappa$ B activity. These findings prompted us to verify the role of NF- $\kappa$ B inhibition in plumbagin-mediated suppression of HER2-positive breast cancer cell invasion. Our recent research revealed high anti-proliferative and pro-apoptotic activity of plumbagin towards HER2-overexpressing breast cancer cells [14], therefore our present research focuses on determining the ability of plumbagin to inhibit HER2-positive breast cancer cell invasion and defining the mechanism of plumbagin-mediated cell invasion inhibition.

## Materials and Methods

### Chemicals

Plumbagin was purchased at >95% purity from Sigma-Aldrich Aldrich (St. Louis, MO, USA). All cell culture material and other chemicals, if not indicated otherwise, were purchased from Sigma-Aldrich (St. Louis, MO, USA).

### Cell Culture

The BT474 and SKBR3 breast cancer cell lines were purchased from Cell Lines Services (Germany). Cells were cultured as previously published [15].

### Cell invasion assay

Cell invasion was examined by using the Boyden chamber assay. 24-well Boyden chambers with 8  $\mu$ M inserts, precoated with Matrigel (BD Biosciences) were used. BT474 and SKBR3

cells ( $5 \times 10^4$  cells per well) were seeded in serum-free medium in the upper chambers and pre-treated with plumbagin for 6 h (0–5  $\mu$ M). Transwell inserts were placed in wells of a 24-well plate with medium supplemented with 10% FBS added to the lower chamber as an attractant. After 24 h of incubation at 37°C the cells on the upper surface of the insert were removed and cells on the lower surface were fixed with 4% formaldehyde and stained with crystal violet (1%). Random fields were photographed and counted under a microscope.

### Western Blot Analysis

BT474 and SKBR3 cells were treated with plumbagin with the indicated concentrations and for the indicated time periods, after which cells were collected and lysed with the RIPA lysis buffer system (Santa Cruz, Heidelberg, Germany) for 30 min on ice. Lysates were centrifuged and supernatants were collected. Equal amounts of protein were resolved by SDS-PAGE and transferred to nitrocellulose membranes. Membranes were blocked with PBS buffer containing 5% non-fat dry milk for 1 h, then incubated overnight at 4°C with specific primary antibodies: anti- $\beta$ -actin (1:1000) (Cell Signaling, Germany), anti-MMP-9 (1:200) (Santa Cruz, Heidelberg, Germany), anti-IKK $\alpha$ , anti-IKK $\beta$ , anti-I $\kappa$ B $\alpha$ , anti-NF- $\kappa$ B (p65) (1:500) (Santa Cruz, Heidelberg, Germany), phospho-specific anti-NF- $\kappa$ B p65 (Ser536), (Cell Signaling, Germany), phospho-specific anti-IKK $\alpha$  (Ser176/180) (R&D Systems, USA). Membranes were next incubated with HRP-conjugated secondary antibodies (1:2000) (Cell Signaling Technology, Germany) at room temperature for 1 h. Proteins were visualized by chemiluminescence (ChemiDoc, Bio-Rad) with a HRP substrate (Pierce).

### NF- $\kappa$ B Activation Assay

The activation of NF- $\kappa$ B was determined with the use of the Ready-To-Glow<sup>TM</sup> NF- $\kappa$ B Secreted Luciferase Reporter System (Clontech). SKBR3 and BT474 cells were transiently transfected with pNF $\kappa$ B-MetLuc2-Reporter Vector and the provided control vector according to the manufacturer's instructions. 24 h post transfection cells were treated with plumbagin (0–2.5  $\mu$ M) for 6 h after which luciferase activity was measured.

### NF- $\kappa$ B p65, IKK $\alpha$ and IKK $\beta$ Knockdown

NF- $\kappa$ B p65 was silenced in BT474 and SKBR3 cells using NF- $\kappa$ B p65 siRNA (Santa Cruz, Heidelberg, Germany). IKK $\alpha$  or IKK $\beta$  was silenced in BT474 and SKBR3 cells using IKK siRNA (Santa Cruz, Heidelberg, Germany). Non-targeted siRNA (Santa Cruz, Heidelberg, Germany) was used as a control. BT474 and SKBR3 cells were transiently transfected with NF- $\kappa$ B p65 siRNA or scrambled siRNA according to the manufacturer's instructions and 24 h post-transfection, cells were either collected for Western blot analysis or treated with plumbagin.

### Statistical analysis

Data are expressed as mean  $\pm$  standard deviation of at least independent experiments. Differences between control and plumbagin-treated samples were analyzed by one-way ANOVA with Tukey's post-hoc tests. Significant differences were established at  $p < 0.05$ .

## Results

### Inhibition of NF- $\kappa$ B activity by plumbagin

The ability of plumbagin to inhibit NF- $\kappa$ B transcriptional activity was examined in HER2-overexpressing breast cancer cell lines with the use of a NF- $\kappa$ B-driven luciferase reporter assay. BT474 and SKBR3 cells were transiently transfected with a vector construct containing the NF-

$\kappa$ B response element driving the expression of sequence-optimized secreted *Metridia* luciferase. 24 h after transfection, cells were treated with plumbagin for 6 h, after which luciferase activity was measured. As shown in Fig 1A, plumbagin significantly reduced luciferase activity in BT474 and SKBR3 cells in a concentration-dependent manner, indicating the ability of

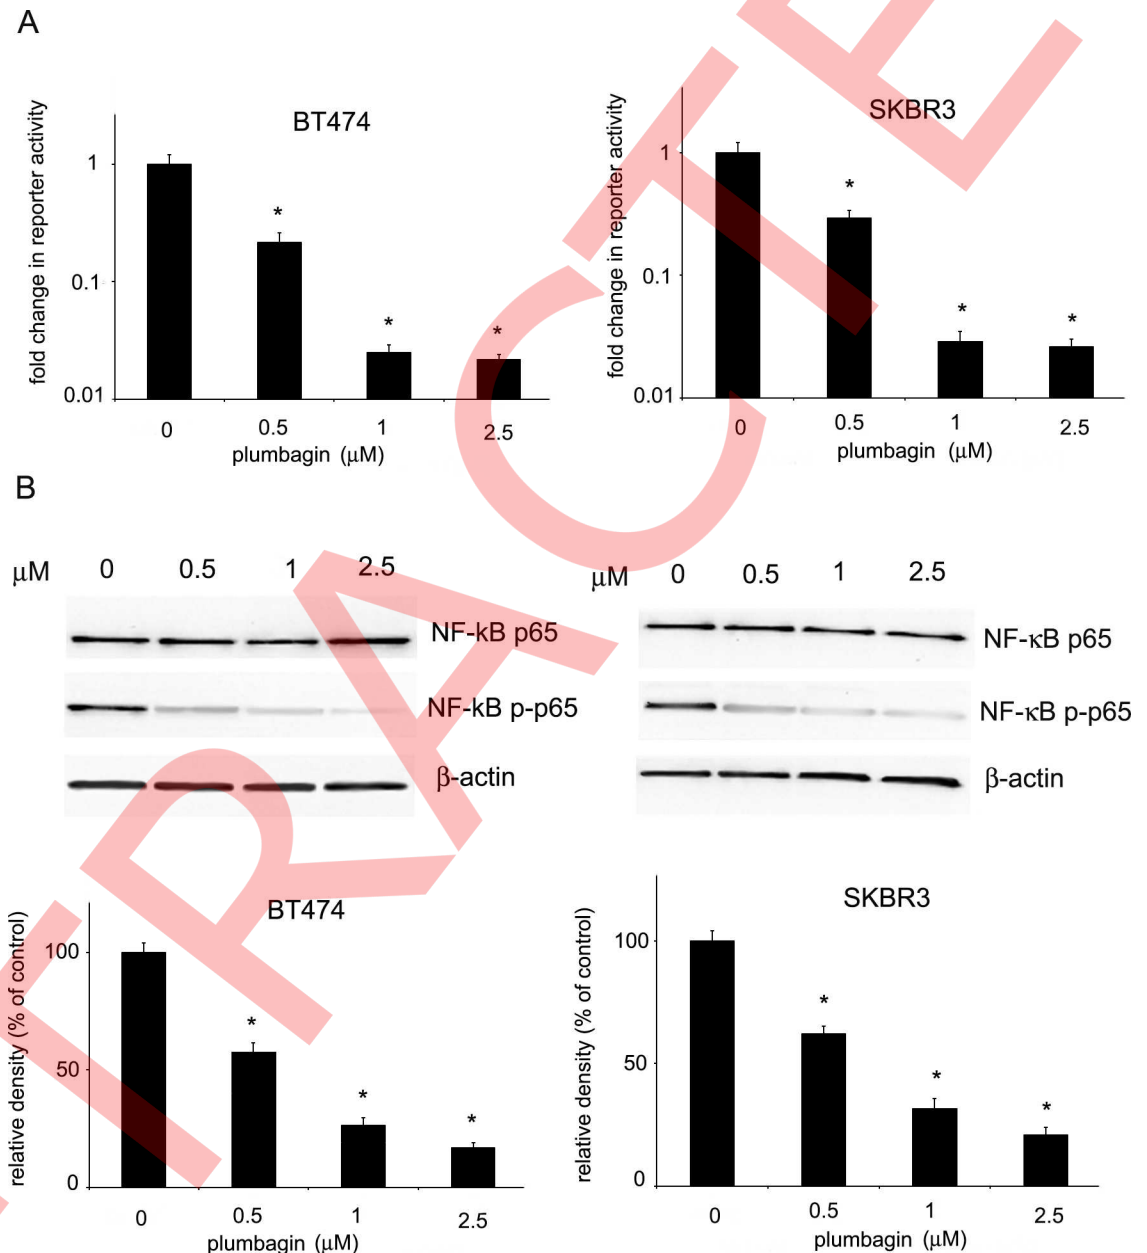

**Fig 1. Inhibition of NF- $\kappa$ B activation in HER2-overexpressing breast cancer cells.** (A) Inhibition of NF- $\kappa$ B transcriptional activity. Cells were transiently transfected with the NF- $\kappa$ B-driven luciferase plasmid NF- $\kappa$ B-MetLuc2 or control vector. After 24 h, cells were treated with plumbagin for 6 h and luciferase activity was measured. The average change in reporter activity is shown from at least three independent experiments (\*,  $p < 0.05$ ). (B) Effects of plumbagin on the expression levels of NF- $\kappa$ B p65 and phosphorylated NF- $\kappa$ B p65. SKBR3 and BT474 cells were treated with plumbagin (0–2.5  $\mu$ M) for 24 h and the levels of phosphorylated NF- $\kappa$ B p65 (Ser536), total NF- $\kappa$ B p65 were determined by Western blot analysis. Values represent mean  $\pm$  SD of three independent experiments.  $p < 0.05$  (\*) indicates differences between control and plumbagin-treated cells.

doi:10.1371/journal.pone.0164064.g001

plumbagin to inhibit NF- $\kappa$ B transcriptional activity in HER2-overexpressing cells. To further confirm the inhibition of NF- $\kappa$ B transcriptional activity by plumbagin, the influence of plumbagin on the phosphorylation of the p65 subunit of NF- $\kappa$ B in HER2-overexpressing cells was examined. Phosphorylation of p65 at serine 536, a marker of increased transcriptional activity, was evaluated in BT474 and SKBR3 cells. Cells were treated with plumbagin in the concentration range of (0–2.5  $\mu$ M) for 24 h and protein levels were determined with Western blot analysis. A decrease in NF- $\kappa$ B p65 phosphorylation was observed upon plumbagin treatment in BT474 and SKBR3 cells, whereas no changes in total NF- $\kappa$ B p65 levels were observed (Fig 1B).

### Inhibition of breast cancer cell invasion by plumbagin through NF- $\kappa$ B inhibition

The ability of plumbagin to inhibit the invasion of HER2-overexpressing breast cancer cells was evaluated with the use of the Boyden chamber assay. BT474 and SKBR3 cells were pre-treated with plumbagin for 6 h in the concentration range of 0–5  $\mu$ M. After a 24h incubation, staining of cells revealed significant inhibition of HER2-positive cell invasion. At the concentration of 1  $\mu$ M, a 25% and 20% reduction in cell invasion was observed in BT474 and SKBR3 cells, respectively (Fig 2A). Since the induction of cell invasion has been correlated with the expression of NF- $\kappa$ B-regulated gene products such as matrix metalloproteinase 9 (MMP-9), the influence of plumbagin on the expression of MMP-9 was evaluated. SKBR3 and BT474 cells were treated with increasing concentrations of plumbagin and Western blot analysis was performed. The results showed a concentration-dependent decrease in the levels of MMP-9 upon plumbagin treatment in HER2-positive cells (Fig 2B).

To further determine the role of NF- $\kappa$ B inhibition by plumbagin in HER2-positive cell invasion suppression, NF- $\kappa$ B p65 expression was transiently silenced with siRNA and the inhibition of cell invasion by plumbagin was evaluated. SKBR3 and BT474 cells were transfected with p65 siRNA and control, scrambled siRNA. 24 hours after transfection p65 silencing was confirmed by determining the levels of p65 in transfected BT474 and SKBR3 cells with Western blot analysis. A significant reduction in p65 levels was observed in cells transfected with p65 siRNA in comparison with cells transfected with control siRNA (Fig 3A). The role of NF- $\kappa$ B p65 in plumbagin-mediated cell invasion inhibition was determined in cells with reduced p65 expression. 24 h after transfection BT474 and SKBR3 cells were treated with plumbagin (1  $\mu$ M) and the invasive potential of cells was analyzed. The silencing of p65 in HER2 positive cells increased the sensitivity of cells towards plumbagin (Fig 3B). The percentage of cells with invasive properties reduced significantly in cells with p65 knockdown in comparison with control cells, indicating the involvement of NF- $\kappa$ B inhibition in plumbagin-mediated invasion inhibition of HER2 positive cells (Fig 3B).

### Inhibition of IKK $\alpha$ -mediated NF- $\kappa$ B activation by plumbagin

It has been shown that NF- $\kappa$ B is induced in HER2-positive breast cancer cells predominantly through the activation of the canonical pathway involving I $\kappa$ B kinase  $\alpha$  (IKK $\alpha$ ). To determine the role of IKK $\alpha$  in plumbagin-mediated NF- $\kappa$ B inhibition, the levels of IKK $\alpha$  and phosphorylated IKK $\alpha$  in plumbagin-treated HER2-positive cells were analyzed. Western blot analysis revealed a substantial decrease in the levels of phosphorylated IKK $\alpha$  in BT474 and SKBR3 cells. The activation of IKK $\alpha$  leads to I $\kappa$ B $\alpha$  phosphorylation and degradation which is essential for the release of NF- $\kappa$ B and its activation. To determine the influence of plumbagin on I $\kappa$ B $\alpha$ , the levels of I $\kappa$ B $\alpha$  were determined by Western blot analysis in plumbagin-treated SKBR3 and BT474 cells. Stabilization of I $\kappa$ B $\alpha$  was observed upon treatment of BT474 and SKBR3 cells with plumbagin (Fig 4). These results point to the involvement IKK $\alpha$  suppression in



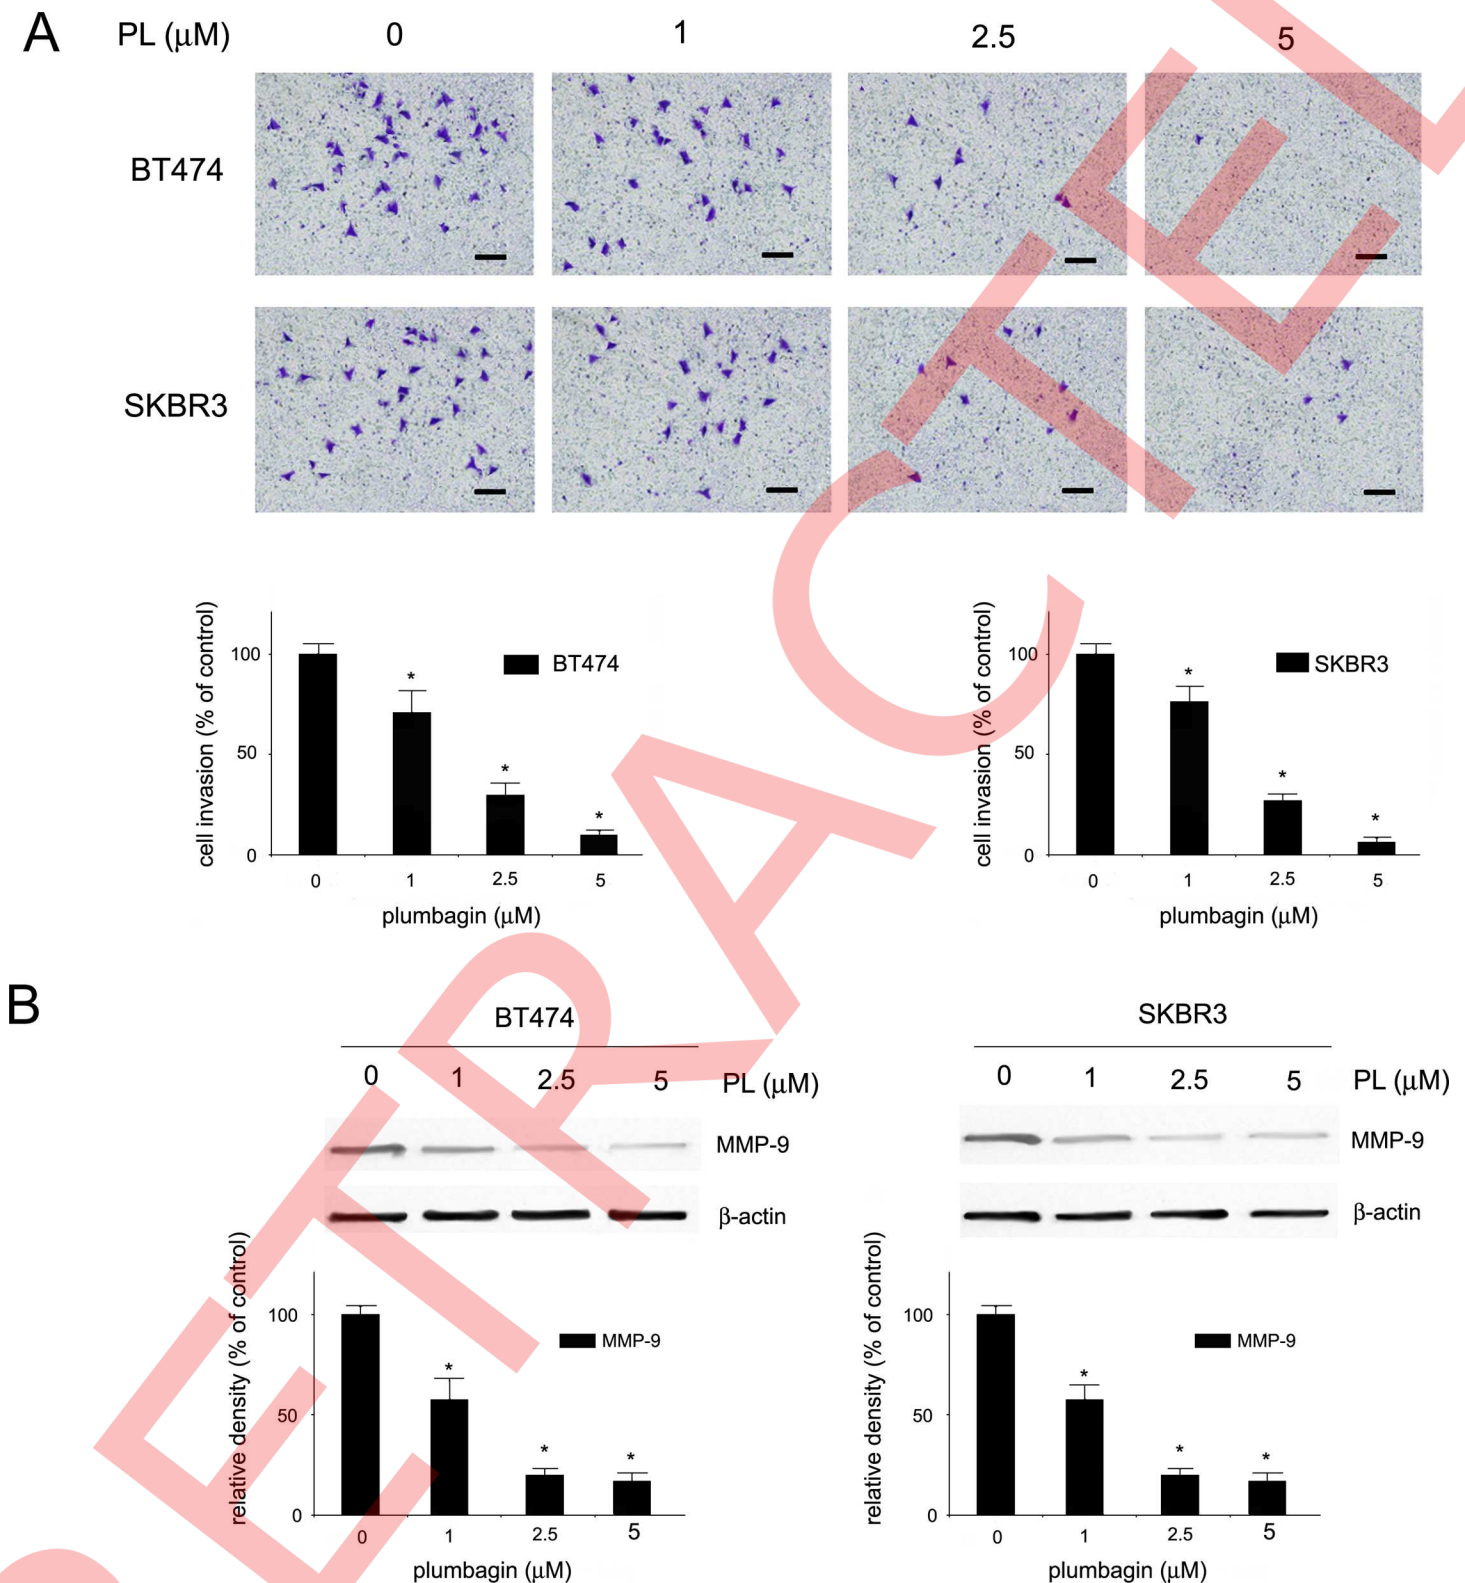

**Fig 2. Inhibition of cell invasion by plumbagin in HER2-overexpressing breast cancer cells and inhibition of MMP-9 expression.** (A) The invasion of BT474 and SKBR3 cells was examined with a Boyden chamber assay. Cells were pre-treated with plumbagin (0–5  $\mu$ M) for 6 h and after a 24 h incubation inserts were assessed for cell invasion. Scale bars correspond to 100  $\mu$ m (B) Influence of plumbagin on expression levels of MMP-9. BT474 and SKBR3 cells were treated with plumbagin (0–5  $\mu$ M) and protein levels were determined with Western blot analysis using the specific antibodies. Values represent mean  $\pm$  SD of three independent experiments.  $p < 0.05$  (\*) indicates differences between control and plumbagin-treated cells.

doi:10.1371/journal.pone.0164064.g002

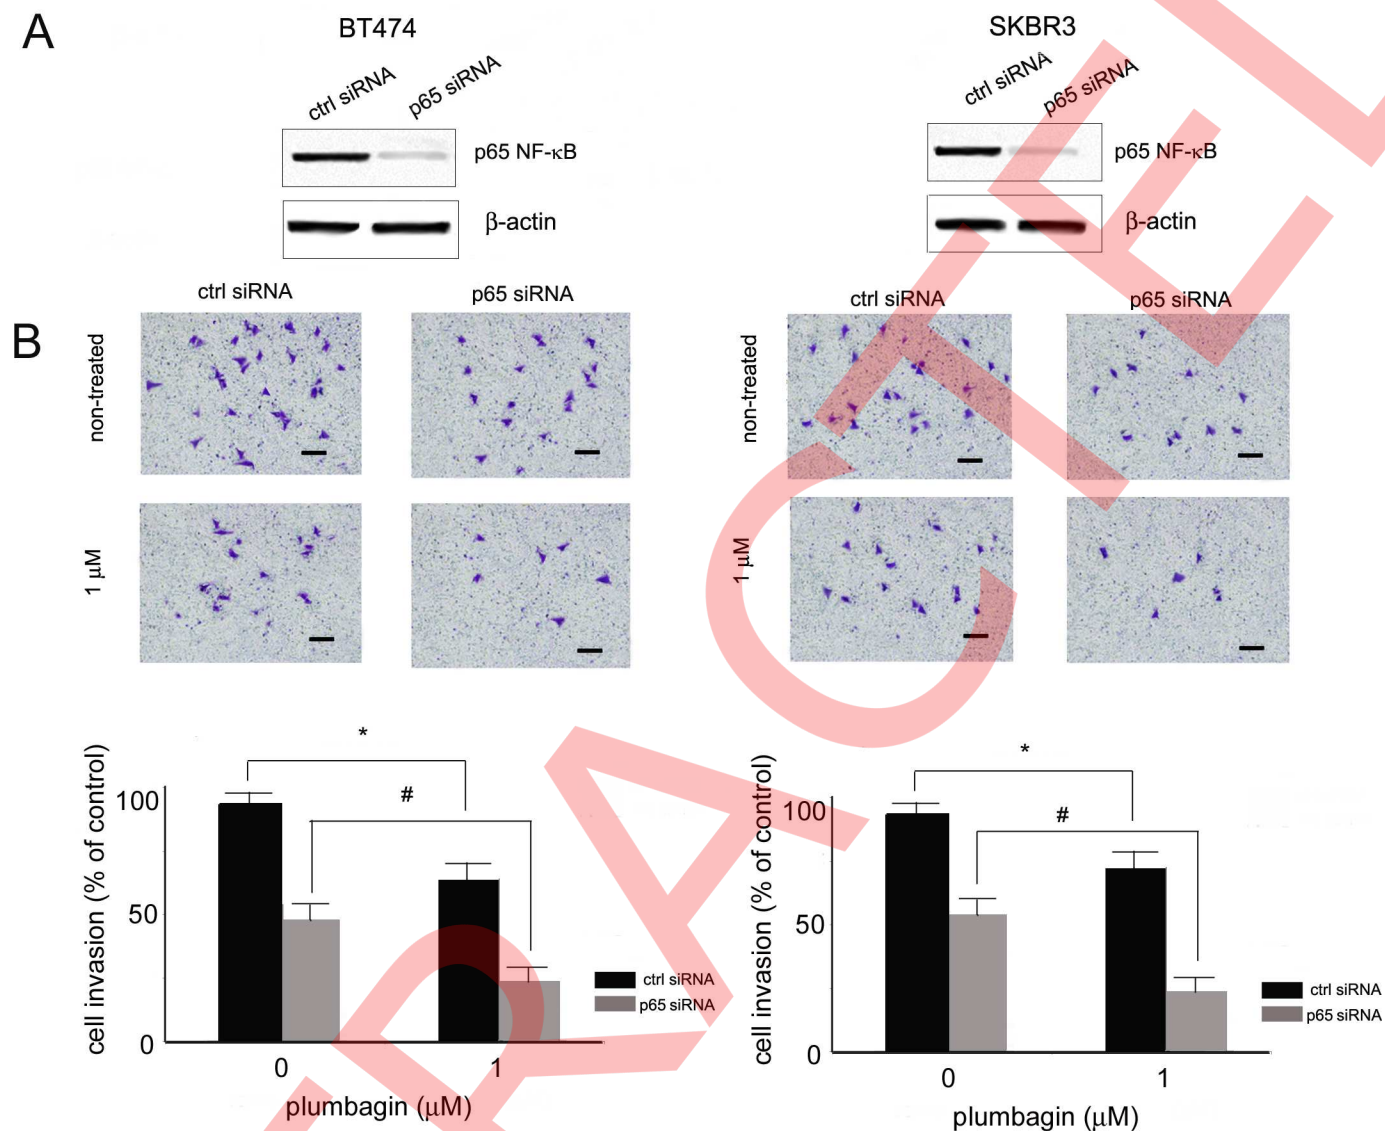

**Fig 3. Role of NF- $\kappa$ B inhibition in plumbagin-mediated invasion of breast cancer cells.** (A) Silencing of NF- $\kappa$ B p65 by siRNA in BT474 and SKBR3 cells. Cells were transiently transfected with p65 siRNA and 24 h after transfection, p65 silencing was confirmed with Western blot analysis. (B) Inhibition of cell invasion by plumbagin in cells transfected with p65 siRNA and control siRNA. 24 h after transfection cells cell invasion was examined with the Boyden chamber assay. Cells were pre-treated with plumbagin (1  $\mu$ M) for 6 h and after 24 h cells were stained. Representative of three independent experiments.  $p < 0.05$  (\*) indicate differences between control siRNA and p65 siRNA transfected cells treated with plumbagin.  $p < 0.05$  (#) indicates differences between plumbagin-treated p65 knockdown and control p65 knockdown cells.

doi:10.1371/journal.pone.0164064.g003

plumbagin-induced NF- $\kappa$ B inhibition in HER-overexpressing breast cancer cells. To determine the role of IKK $\alpha$  in plumbagin-mediated NF- $\kappa$ B inhibition, IKK $\alpha$  expression was transiently silenced in BT474 and SKBR3 cells and NF- $\kappa$ B transcriptional activity was determined. Cells were transfected with IKK $\alpha$  or IKK $\beta$  siRNA and 24 h post transfection IKK $\alpha$  silencing was confirmed with Western blot analysis. As shown in Fig 5A, the levels of IKK $\alpha$  and IKK $\beta$  were significantly reduced in transfected cells in comparison with cells transfected with control siRNA. The role of IKK $\alpha$  and IKK $\beta$ -mediated NF- $\kappa$ B inhibition by plumbagin was determined by evaluating the transcriptional activity of NF- $\kappa$ B in cells with reduced IKK $\alpha$  and IKK $\beta$  expression. HER2-positive cells were treated 24h post transfection with plumbagin (1  $\mu$ M) and

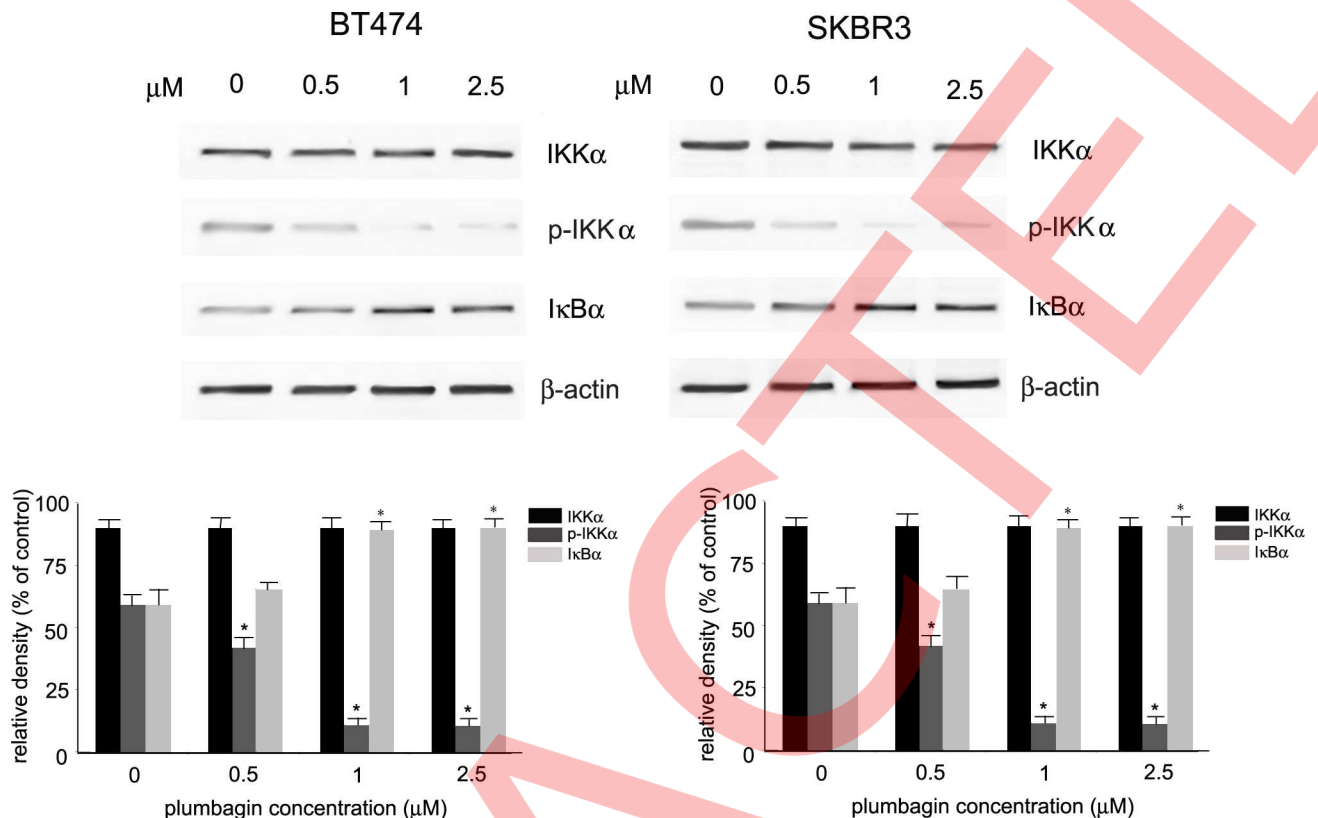

**Fig 4. Influence of plumbagin on proteins involved in HER2-activated IKK $\alpha$  pathway.** BT474 and SKBR3 cells were treated with plumbagin (0–2.5  $\mu$ M) for 24 h and the levels of IKK $\alpha$ , phosphorylated IKK $\alpha$  (Ser176/180), I $\kappa$ B $\alpha$  were determined with Western blot analysis using the specific antibodies. Values represent mean  $\pm$  SD of three independent experiments.  $p < 0.05$  (\*) indicates differences between control and plumbagin-treated cells.

doi:10.1371/journal.pone.0164064.g004

the reporter activity of NF- $\kappa$ B was evaluated. Silencing of IKK $\alpha$  led to a more significant decrease in NF- $\kappa$ B reporter activity in comparison with IKK $\beta$  silencing. Moreover, BT474 and SKBR3 cells with IKK $\alpha$  knockdown showed a significantly higher reduction in plumbagin-mediated NF- $\kappa$ B reporter activity inhibition than cells with IKK $\beta$  knockdown cells (Fig 5B), indicating the involvement of IKK $\alpha$  in plumbagin-mediated NF- $\kappa$ B inhibition in HER2-positive cells. Furthermore, the role of IKK $\alpha$  and IKK $\beta$  in plumbagin-mediated MMP-9 expression inhibition was evaluated. BT474 and SKBR3 cells with reduced IKK $\alpha$  and IKK $\beta$  expression were treated with plumbagin (1  $\mu$ M) for 24 h and the expression levels of MMP-9 were examined. Western blot analysis revealed lower MMP-9 expression in HER2-overexpressing cells with IKK $\alpha$  knockdown in comparison with IKK $\beta$  knockdown cells. The treatment of cells with plumbagin reduced to a greater extent levels of MMP-9 in IKK $\alpha$  knockdown cells than in IKK $\beta$  knockdown cells (Fig 5C). These results indicate the involvement of the IKK $\alpha$ -mediated pathway in the inhibition of NF- $\kappa$ B regulated MMP-9 expression by plumbagin.

## Discussion

NF- $\kappa$ B is a dimeric complex of members of the Rel protein family. The most abundant NF- $\kappa$ B heterodimer, p65/p50, in its inactive state is sequestered in the cytoplasm with the inhibitor of NF- $\kappa$ B (I $\kappa$ B) proteins. Upon I $\kappa$ B phosphorylation and degradation, NF- $\kappa$ B is released and can enter the nucleus and bind to specific DNA sequences to induce the transcription of genes



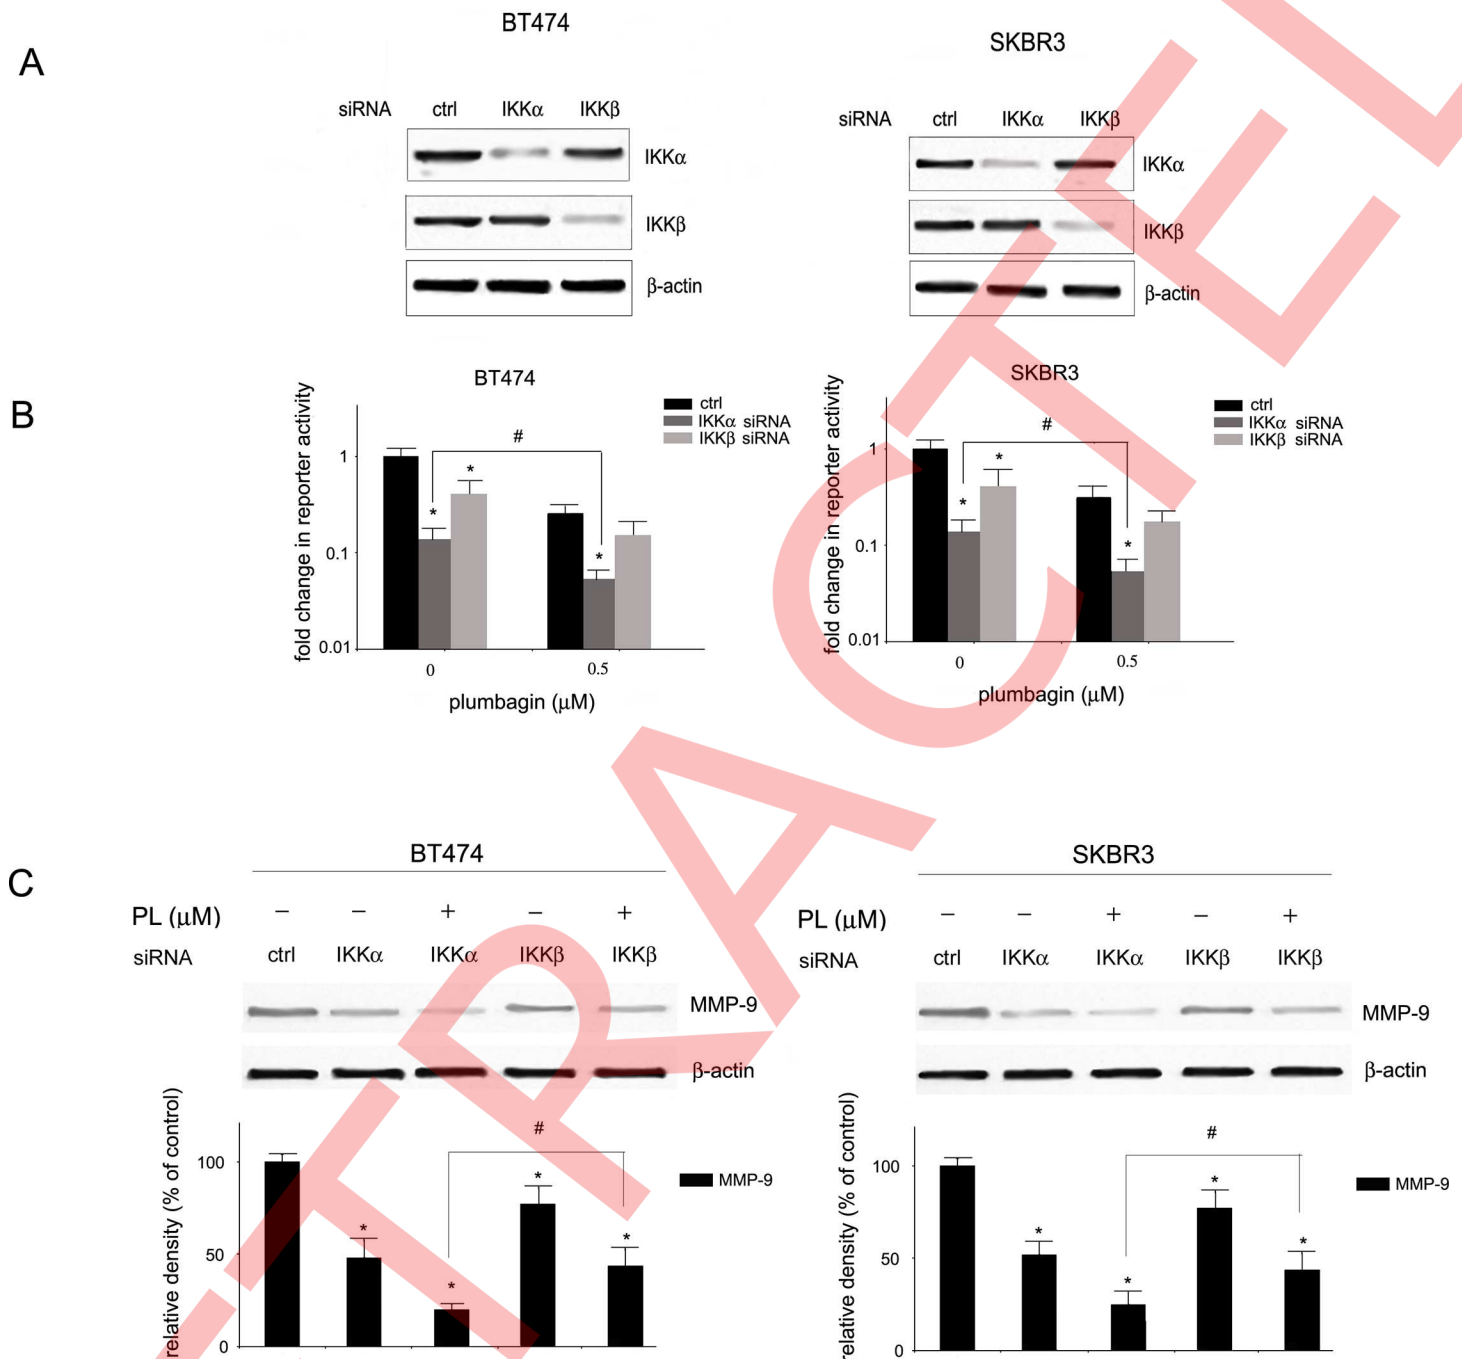

**Fig 5. Role of IKK $\alpha$  inhibition in plumbagin-mediated HER2-positive cell invasion inhibition.** (A) Silencing of IKK $\alpha$  and IKK $\beta$  by siRNA in BT474 and SKBR3 cells. Cells were transiently transfected with IKK $\alpha$  or IKK $\beta$  siRNA and 24 h after transfection, silencing was confirmed with Western blot analysis. (B) Inhibition of NF- $\kappa$ B transcriptional activity by plumbagin in cells transfected with IKK $\alpha$  and IKK $\beta$  knockdown. Cells were transiently transfected with IKK $\alpha$  or IKK $\beta$  siRNA and with the NF- $\kappa$ B-driven luciferase plasmid NF- $\kappa$ B-MetLuc2. After 24 h, cells were treated with plumbagin for 6 h and luciferase activity was measured. The average change in reporter activity is shown from at least three independent experiments (\*,  $p < 0.05$ ). # indicates differences between plumbagin-treated and control IKK $\alpha$  knockdown cells. (C) Influence of plumbagin on expression levels of MMP-9 in IKK $\alpha$  and IKK $\beta$  knockdown cells. Cells were transiently transfected with IKK $\alpha$  or IKK $\beta$  siRNA and 24 h after transfection, levels of MMP-9 were determined with Western blot analysis. Values represent mean  $\pm$  SD of three independent experiments.  $p < 0.05$  (\*) indicates differences between control and transfected cells.  $p < 0.05$  (#) indicates differences between plumbagin-treated IKK $\alpha$  knockdown and plumbagin-treated IKK $\beta$  knockdown cells.

doi:10.1371/journal.pone.0164064.g005

associated with cell survival and tumor promotion. The I $\kappa$ B kinase (IKK) complex has been associated with the activation of NF- $\kappa$ B. IKK contains two catalytic subunits IKK $\alpha$  and IKK $\beta$  and is activated via phosphorylation of either IKK $\alpha$  or IKK $\beta$ . Activation of NF- $\kappa$ B through the canonical pathway involves phosphorylation of I $\kappa$ B $\alpha$  by IKK $\beta$ , which leads to its degradation and release of NF- $\kappa$ B. NF- $\kappa$ B activation can also occur through the non-canonical pathway, involving IKK $\alpha$  and is I $\kappa$ B $\alpha$ -independent [16].

NF- $\kappa$ B is upregulated in many HER2-positive breast cancers. The overexpression of HER2 has been reported to activate NF- $\kappa$ B and induce the expression NF- $\kappa$ B-regulated genes [17], [18]. Herceptin treatment or transfection with mutant I $\kappa$ B suppressed NF- $\kappa$ B activation and reduced the expression of NF- $\kappa$ B-controlled gene products [18]. Interestingly, the upregulation of NF- $\kappa$ B has conversely been shown to activate HER2 expression through the binding of NF- $\kappa$ B to its DNA binding sequence located within the promoter region of HER2, indicating a positive feedback loop between HER2 and NF- $\kappa$ B [19]. The HER2-NF- $\kappa$ B-HER2 loop has been detected upon the induction of NF- $\kappa$ B activity by anti-cancer therapy, such as radiation therapy, and has been suggested to confer adaptive resistance [20]. The PI3K/Akt pathway which lies downstream of the HER2 receptor has been implicated in NF- $\kappa$ B activation [18], [21], [22]. The overexpression of HER2 was shown to constitutively induce PI3K- and Akt kinase activities and upregulate NF- $\kappa$ B. Inhibition of PI3 kinase with the PI3K inhibitor wortmannin or ectopic expression of an inactive kinase variant reduced NF- $\kappa$ B activity. Furthermore, induction or repression of Akt kinase activity increased or decreased NF- $\kappa$ B activity, respectively [22]. In another study Akt inhibition suppressed I $\kappa$ B phosphorylation and NF- $\kappa$ B activation and sensitized HER2-positive cells to apoptosis induction [21]. Studies have shown the involvement of both an IKK-dependent and IKK-independent mechanism in PI3K/Akt-mediated NF- $\kappa$ B upregulation [23]. Pianetti et al. [22] reported that HER2-mediated activation of NF- $\kappa$ B via PI3K/Akt signaling is IKK-independent. NF- $\kappa$ B activation was found to be mediated through a non-IKK/proteasome pathway involving calpain-induced I $\kappa$ B $\alpha$  degradation. Conversely, Zhou et al. [21] reported an IKK-dependent mechanism of NF- $\kappa$ B activation that required Akt kinase activity. Dan et al. [24] reported IKK-induced NF- $\kappa$ B activity through a mechanism involving the mTOR-associated protein Raptor. Raptor was demonstrated to induce IKK activity in a Akt-dependent manner which was suppressed with the use of a mTOR inhibitor, rapamycin [24]. The involvement of IKK in HER2-mediated NF- $\kappa$ B upregulation was also shown by Merkhofer et al. [3]. The mechanism of NF- $\kappa$ B activation was PI3K-independent as inhibition of PI3 kinase with the PI3K inhibitor LY294002 had no effect on NF- $\kappa$ B activity.

The results of our study showed that plumbagin inhibits NF- $\kappa$ B activity in HER2-overexpressing cells through the canonical pathway involving I $\kappa$ B kinase  $\alpha$  (IKK $\alpha$ ) downregulation. The treatment of BT474 and SKBR3 cells with plumbagin led to a decrease in the levels of phosphorylated IKK $\alpha$  and stabilization of the inhibitor of NF- $\kappa$ B—I $\kappa$ B $\alpha$ . Furthermore, the transcriptional activity of NF- $\kappa$ B was inhibited by plumbagin and a decrease in the levels of phosphorylated p65 were observed. The studies of Merkhofer et al. [3] showed that NF- $\kappa$ B activation in HER2-positive cells is associated with IKK $\alpha$  pathway activation. The knockdown of IKK $\alpha$  had a stronger effect on the inhibition of NF- $\kappa$ B phosphorylation and NF- $\kappa$ B activation in HER2-positive cells than IKK $\beta$  knockdown [3]. Similarly, our studies showed that IKK $\alpha$  knockdown cells were more susceptible to plumbagin-mediated NF- $\kappa$ B inhibition than HER2-positive cells with IKK $\beta$  knockdown.

HER2-overexpressing breast cancer cells display increased aggressiveness and invasive potential [25]. The induction of the invasive potential of breast cancer cells and malignant phenotype maintenance has been linked with NF- $\kappa$ B upregulation. The inhibition of NF- $\kappa$ B has been shown to prevent the formation of the invasive phenotype of breast cancer cells *in vitro* and abrogate breast cancer metastasis *in vivo* [5]. The results of our research showed that

plumbagin inhibited the expression of the NF- $\kappa$ B target gene, matrix metalloproteinase 9 (MMP-9), a type IV collagenase that promotes tumor invasiveness and metastasis [26]. Research has shown that the IKK $\alpha$ -induced NF- $\kappa$ B pathway plays a predominantly greater role in inducing the invasive phenotype in HER2-overexpressing breast cancer cells than the IKK $\beta$  pathway. The knockdown of IKK $\alpha$  has been shown to significantly block the expression of NF- $\kappa$ B-regulated cytokine and chemokine gene expression in HER2-positive cells in comparison with IKK $\beta$  knockdown. In agreement with these findings our research showed that the knockdown of IKK $\alpha$  reduced the levels of MMP-9 in HER2-positive cells to a greater extent than IKK $\beta$  knockdown. Moreover, HER2-positive cells with IKK $\alpha$  knockdown were more sensitive to plumbagin-mediated MMP-9 inhibition. Apart from the role of IKK $\alpha$  in tumor cell invasion, IKK $\alpha$  plays an important part in HER2-driven tumor formation. In a study conducted by Cao et al. [27] the knockdown of IKK $\alpha$  reduced HER2 positive tumor formation in mice through downregulating cyclin D1 expression and reducing the proliferation potential of cancer cells. Moreover, IKK $\alpha$  knockdown diminished the self-renewal capacity of tumor-initiating cells, thus indicating that IKK $\alpha$  plays an important role in HER2-mediated oncogenesis [27].

Research has pointed to the ability of plumbagin to inhibit NF- $\kappa$ B activity in various cancer cell lines [23–26] [29], including breast cancer cells. Plumbagin was found to inhibit NF- $\kappa$ B activity in ER-positive MCF-7 and triple negative MDA-MB-231 cells [30]. Furthermore, plumbagin has been shown to suppress the migration and invasion various types of cancer cells, including liver [31], lung [32], gastric [33] prostate [8] and glioma cells [34]. The ability of plumbagin to inhibit cell migration and invasion has also been demonstrated in breast cancer cells, mainly triple negative MDA-MB-231 breast cancer cells. Plumbagin inhibited the migration and invasion of MDA-MB-231SARfp cells, breast cancer cells derived from breast cancer bone metastatic sites, exhibiting bone metastases properties [13]. Sung et al. [35] showed that osteolytic bone metastasis suppression in triple negative MDA-MB-231 mouse xenografts by plumbagin is accompanied by preservation of cancellous/trabecular bone volume [35]. Furthermore, the results of Sung et al. [35] reported that plumbagin inhibits breast cancer-induced metastasis through the suppression of RANKL-mediated NF- $\kappa$ B activation. Li et al. [36] reported that plumbagin inhibits the expression of osteoclast-activating factors by suppressing NF- $\kappa$ B activity in triple negative breast cancer cells. The studies of Manu et al. [10] showed that plumbagin inhibited cell migration and invasion of MDA-MB-231 cells by downregulating the expression of the chemokine receptor CXCR4. Plumbagin-mediated downregulation of CXCR4 correlated with its ability to inhibit the migration and invasion of MDA-MB-231 cells as shown by blocking CXCL-12-induced migration and invasion [10]. Furthermore, plumbagin suppressed NF- $\kappa$ B activation in MDA-MB-231 cells and inhibited NF- $\kappa$ B binding to the CXCR4 promoter. Since HER2 has been reported to induce the expression of CXCR4, the authors examined the influence of plumbagin on CXCR4 expression in HER2-positive cells and showed a reduction in the expression of CXCR4 in BT474 cells upon plumbagin treatment.

Our research confirmed that plumbagin suppresses the invasion of HER2-positive breast cancer cells through the inhibition of NF- $\kappa$ B. Our previous study showed that plumbagin induces apoptosis in HER2-overexpressing breast cancer cells through the upregulation of pro-apoptotic Bcl-2 family proteins [14]. The inhibition of cell invasion by plumbagin demonstrated in the present study is not associated with the cell death-inducing properties of plumbagin. The treatment of HER2-overexpressing breast cancer cells with 1  $\mu$ M plumbagin led to significant inhibition of cell invasion, whereas at this concentration cell growth inhibition was not observed. Our previous research also showed that plumbagin-mediated cell death induction is associated with the downregulation of the NF- $\kappa$ B-regulated pro-apoptotic Bcl-2 protein [14]. This confirms our present findings regarding the ability of plumbagin to downregulate

NF- $\kappa$ B-induced gene products. Previous studies have also shown the ability of plumbagin to inhibit the expression of NF- $\kappa$ B-regulated antiapoptotic, proliferative and angiogenic gene products [37],[38],[33]. Plumbagin-mediated down-regulation of NF- $\kappa$ B-controlled gene products involved in cell invasion, such as MMP-2, MMP-9 and u-PA, has been demonstrated in various types of cancer cells, including triple negative breast cancer, prostate, lung and liver [13],[28],[31],[32]. The present research demonstrates the involvement of IKK $\alpha$  in NF- $\kappa$ B-mediated MMP-9 downregulation by plumbagin. Previous studies have pointed to the ability of plumbagin to inhibit the DNA binding activity of NF- $\kappa$ B [37],[38], thus an IKK $\alpha$ -independent mechanism of NF- $\kappa$ B inhibition by plumbagin in HER2-positive breast cancer cells cannot be ruled out. The inhibition of NF- $\kappa$ B binding to DNA by plumbagin was suggested to be through the modification of the NF- $\kappa$ B protein. The targeting of a cysteine residue in the p65 subunit of NF- $\kappa$ B was suggested since the effects of plumbagin were reversed by using a reducing agent. Furthermore, plumbagin failed to inhibit the DNA binding activity of NF- $\kappa$ B when a Cys-38 residue of p65 was replaced by serine [37]. Since the Cys-38 residue of the p65 subunit of NF- $\kappa$ B has been identified as crucial for DNA binding [39], Cys-38 modification by plumbagin could contribute to NF- $\kappa$ B inhibition in HER2-positive breast cancer cells. These findings are consistent with our observation that plumbagin suppresses p65-induced NF- $\kappa$ B reporter activity.

The correlation between NF- $\kappa$ B activation and HER2-mediated cell invasion points to the promising potential of plumbagin in HER2-overexpressing breast cancer treatment. This is the first report on the effects of plumbagin on NF- $\kappa$ B inhibition in HER2-overexpressing breast cancer cells. The inhibition of HER2-positive cell invasion was found to be mediated by plumbagin through NF- $\kappa$ B p65 inhibition and downregulation of NF- $\kappa$ B-regulated MMP-9. Moreover, plumbagin was showed to suppress IKK $\alpha$ -mediated NF- $\kappa$ B activation, which plays an important role in HER2-driven tumor formation. Thus our results provide an important basis for further research toward understanding the role of plumbagin in the potential treatment of HER2-overexpressing breast cancer.

## Acknowledgments

Cost of open access publication supported from the project MOBI4Health that has received funding from the European Union's Seventh Framework Programme for research, technological development and demonstration under grant agreement no. 316094 and from the Polish Ministry of Science and Higher Education within the programme for international co-funded projects.

## Author Contributions

**Conceptualization:** AK.

**Data curation:** AK.

**Formal analysis:** AK.

**Funding acquisition:** AK.

**Investigation:** AK AD.

**Methodology:** AK AD.

**Project administration:** AK.

**Resources:** AK.



**Software:** AK.

**Supervision:** AK.

**Validation:** AK.

**Visualization:** AK AD.

**Writing – original draft:** AK.

**Writing – review & editing:** AK.

## References

1. Yu D, Hung MC. Overexpression of ErbB2 in cancer and ErbB2-targeting strategies. *Oncogene*. 2000;19: 6115–6121. doi: [10.1038/sj.onc.1203972](https://doi.org/10.1038/sj.onc.1203972) PMID: [11156524](https://pubmed.ncbi.nlm.nih.gov/11156524/)
2. Park JW, Neve RM, Szollosi J, Benz CC. Unraveling the biologic and clinical complexities of HER2. *Clin Breast Cancer*. 2008;8: 392–401. Available: <http://dx.doi.org/10.3816/CBC.2008.n.047> doi: [10.3816/CBC.2008.n.047](https://doi.org/10.3816/CBC.2008.n.047) PMID: [18952552](https://pubmed.ncbi.nlm.nih.gov/18952552/)
3. Merkhofer EC, Cogswell P, Baldwin AS. Her2 activates NF-kappaB and induces invasion through the canonical pathway involving IKKalpha. *Oncogene*. 2010;29: 1238–48. Available: <http://www.scopus.com/inward/record.url?eid=2-s2.0-77649190700&partnerID=tZotx3y1> doi: [10.1038/nc.2009.410](https://doi.org/10.1038/nc.2009.410) PMID: [19946332](https://pubmed.ncbi.nlm.nih.gov/19946332/)
4. Xia W, Bacus S, Husain I, Liu L, Zhao S, Liu Z, et al. Resistance to ErbB2 tyrosine kinase inhibitors in breast cancer is mediated by calcium-dependent activation of RelA. *Mol Cancer Ther*. 2010;9: 292–9. Available: <http://www.ncbi.nlm.nih.gov/pubmed/20124457> doi: [10.1158/1535-7163.MCT-09-1041](https://doi.org/10.1158/1535-7163.MCT-09-1041) PMID: [20124457](https://pubmed.ncbi.nlm.nih.gov/20124457/)
5. Huber MA, Azoitei N, Baumann B, Grünert S, Sommer A, Pehamberger H, et al. NF-kappaB is essential for epithelial-mesenchymal transition and metastasis in a model of breast cancer progression. *J Clin Invest*. American Society for Clinical Investigation; 2004;114: 569–81. doi: [10.1172/JCI21358](https://doi.org/10.1172/JCI21358) PMID: [15314694](https://pubmed.ncbi.nlm.nih.gov/15314694/)
6. Marczak L, Kawiak A, Łojkowska E, Stobiecki M. Secondary metabolites in in vitro cultured plants of the genus *Drosera*. *Phytochem Anal*. 2005;16: 143–149. doi: [10.1002/pca.833](https://doi.org/10.1002/pca.833) PMID: [15997845](https://pubmed.ncbi.nlm.nih.gov/15997845/)
7. de Paiva SR, Figueiredo MR, Kaplan MAC. Isolation of secondary metabolites from roots of *Plumbago auriculata* Lam. by countercurrent chromatography. *Phytochem Anal*. 2005;16: 278–281. doi: [10.1002/pca.841](https://doi.org/10.1002/pca.841) PMID: [16042155](https://pubmed.ncbi.nlm.nih.gov/16042155/)
8. Aziz MH, Dreckschmidt NE, Verma AK. Plumbagin, a medicinal plant-derived naphthoquinone, is a novel inhibitor of the growth and invasion of hormone-refractory prostate cancer. *Cancer Res*. 2008;68: 9024–9032. doi: [10.1158/0008-5472.CAN-08-2494](https://doi.org/10.1158/0008-5472.CAN-08-2494) PMID: [18974148](https://pubmed.ncbi.nlm.nih.gov/18974148/)
9. Wang CCC, Chiang Y-M, Sung S-C, Hsu Y-L, Chang J-K, Kuo P-L, et al. Plumbagin induces cell cycle arrest and apoptosis through reactive oxygen species/c-Jun N-terminal kinase pathways in human melanoma A375.S2 cells. *Cancer Lett*. Elsevier; 2008;259: 82–98. doi: [10.1016/j.canlet.2007.10.005](https://doi.org/10.1016/j.canlet.2007.10.005) PMID: [18023967](https://pubmed.ncbi.nlm.nih.gov/18023967/)
10. Manu K, Shanmugam MK, Rajendran P, Li F, Ramachandran L, Hay H, et al. Plumbagin inhibits invasion and migration of breast and gastric cancer cells by downregulating the expression of chemokine receptor CXCR4. *Mol Cancer*. BioMed Central; 2011;10: 107. doi: [10.1186/1476-4598-10-107](https://doi.org/10.1186/1476-4598-10-107) PMID: [21880153](https://pubmed.ncbi.nlm.nih.gov/21880153/)
11. Thasni KA, Ratheeshkumar T, Rojini G, Sivakumar KC, Nair RS, Srinivas G, et al. Structure activity relationship of plumbagin in BRCA1 related cancer cells. *Mol Carcinog*. 2013;52: 392–403. doi: [10.1002/mc.21877](https://doi.org/10.1002/mc.21877) PMID: [22290577](https://pubmed.ncbi.nlm.nih.gov/22290577/)
12. Kuo P-L, Hsu Y-L, Cho C-Y. Plumbagin induces G2-M arrest and autophagy by inhibiting the AKT/ mammalian target of rapamycin pathway in breast cancer cells. *Mol Cancer Ther*. Molecular Cancer Therapeutics; 2006;5: 3209–21. doi: [10.1158/1535-7163.MCT-06-0478](https://doi.org/10.1158/1535-7163.MCT-06-0478) PMID: [17172425](https://pubmed.ncbi.nlm.nih.gov/17172425/)
13. Yan W, Tu B, Liu Y-Y, Wang T-Y, Qiao H, Zhai Z-J, et al. Suppressive Effects of Plumbagin on Invasion and Migration of Breast Cancer Cells via the Inhibition of STAT3 Signaling and Down-regulation of Inflammatory Cytokine Expressions. *Bone Res*. Nature Publishing Group; 2013;1: 362–70. doi: [10.4248/BR201304007](https://doi.org/10.4248/BR201304007) PMID: [26273514](https://pubmed.ncbi.nlm.nih.gov/26273514/)
14. Kawiak A, Zawacka-Pankau J, Łojkowska E. Plumbagin induces apoptosis in Her2-overexpressing breast cancer cells through the mitochondrial-mediated pathway. *J Nat Prod*. 2012;75: 747–751. doi: [10.1021/np3000409](https://doi.org/10.1021/np3000409) PMID: [22512718](https://pubmed.ncbi.nlm.nih.gov/22512718/)

15. Kawiak A, Lojkowska E. Ramentaceone, a naphthoquinone derived from *Drosera* sp., induces apoptosis by suppressing PI3K/Akt signaling in breast cancer cells. *PLoS One*. 2016;11: e0147718. doi: [10.1371/journal.pone.0147718](https://doi.org/10.1371/journal.pone.0147718) PMID: [26840401](https://pubmed.ncbi.nlm.nih.gov/26840401/)
16. Gilmore TD. Introduction to NF-kappaB: players, pathways, perspectives. *Oncogene*. 2006;25: 6680–6684. Available: <http://www.ncbi.nlm.nih.gov/pubmed/17072321> doi: [10.1038/sj.onc.1209954](https://doi.org/10.1038/sj.onc.1209954) PMID: [17072321](https://pubmed.ncbi.nlm.nih.gov/17072321/)
17. Galang CK, García-Ramírez J, Solski PA, Westwick JK, Der CJ, Nezhnanov NN, et al. Oncogenic Neu/ ErbB-2 increases ets, AP-1, and NF-kappaB-dependent gene expression, and inhibiting ets activation blocks Neu-mediated cellular transformation. *J Biol Chem*. 1996;271: 7992–8. Available: <http://www.ncbi.nlm.nih.gov/pubmed/8626480> doi: [10.1074/jbc.271.14.7992](https://doi.org/10.1074/jbc.271.14.7992) PMID: [8626480](https://pubmed.ncbi.nlm.nih.gov/8626480/)
18. Guo G, Wang T, Gao Q, Tamae D, Wong P, Chen T, et al. Expression of ErbB2 enhances radiation-induced NF-kappaB activation. *Oncogene*. 2004;23: 535–45. doi: [10.1038/sj.onc.1207149](https://doi.org/10.1038/sj.onc.1207149) PMID: [14724581](https://pubmed.ncbi.nlm.nih.gov/14724581/)
19. Cao N, Li S, Wang Z, Ahmed KM, Degnan ME, Fan M, et al. NF-kappaB-mediated HER2 overexpression in radiation-adaptive resistance. *Radiat Res*. 2009;171: 9–21. doi: [10.1667/RR1472.1](https://doi.org/10.1667/RR1472.1) PMID: [19138055](https://pubmed.ncbi.nlm.nih.gov/19138055/)
20. Duru N, Candas D, Jiang G, Li JJ. Breast cancer adaptive resistance: HER2 and cancer stem cell repopulation in a heterogeneous tumor society. *J Cancer Res Clin Oncol*. Springer; 2014;140: 1–14. doi: [10.1007/s00432-013-1494-1](https://doi.org/10.1007/s00432-013-1494-1) PMID: [23990015](https://pubmed.ncbi.nlm.nih.gov/23990015/)
21. Zhou BP, Hu MC, Miller SA, Yu Z, Xia W, Lin SY, et al. HER-2/neu blocks tumor necrosis factor-induced apoptosis via the Akt/NF-kappaB pathway. *J Biol Chem*. 2000;275: 8027–31. Available: <http://www.ncbi.nlm.nih.gov/pubmed/10713122> doi: [10.1074/jbc.275.11.8027](https://doi.org/10.1074/jbc.275.11.8027) PMID: [10713122](https://pubmed.ncbi.nlm.nih.gov/10713122/)
22. Pianetti S, Arsura M, Romieu-Mourez R, Coffey RJ, Sonenshein GE. Her-2/neu overexpression induces NF- $\kappa$ B via a PI3-kinase/Akt pathway involving calpain-mediated degradation of I $\kappa$ B- $\alpha$  that can be inhibited by the tumor suppressor PTEN. *Oncogene*. Nature Publishing Group; 2001;20: 1287–1299. doi: [10.1038/sj.onc.1204257](https://doi.org/10.1038/sj.onc.1204257) PMID: [11313873](https://pubmed.ncbi.nlm.nih.gov/11313873/)
23. Ahmed KM, Cao N, Li JJ. HER-2 and NF-kappaB as the targets for therapy-resistant breast cancer. *Anticancer Res*. 26: 4235–43. Available: <http://www.ncbi.nlm.nih.gov/pubmed/17201139> PMID: [17201139](https://pubmed.ncbi.nlm.nih.gov/17201139/)
24. Dan HC, Cooper MJ, Cogswell PC, Duncan JA, Ting JP- Y, Baldwin AS. Akt-dependent regulation of NF- B is controlled by mTOR and Raptor in association with IKK. *Genes Dev*. Cold Spring Harbor Laboratory Press; 2008;22: 1490–1500. doi: [10.1101/gad.1662308](https://doi.org/10.1101/gad.1662308) PMID: [18519641](https://pubmed.ncbi.nlm.nih.gov/18519641/)
25. Gupta P, Srivastava SK. HER2 mediated de novo production of TGF $\beta$  leads to SNAIL driven epithelial-to-mesenchymal transition and metastasis of breast cancer. *Mol Oncol*. Elsevier; 2014;8: 1532–1547. doi: [10.1016/j.molonc.2014.06.006](https://doi.org/10.1016/j.molonc.2014.06.006) PMID: [24994678](https://pubmed.ncbi.nlm.nih.gov/24994678/)
26. Min C, Eddy SF, Sherr DH, Sonenshein GE. NF-kappaB and epithelial to mesenchymal transition of cancer. *J Cell Biochem*. 2008;104: 733–44. doi: [10.1002/jcb.21695](https://doi.org/10.1002/jcb.21695) PMID: [18253935](https://pubmed.ncbi.nlm.nih.gov/18253935/)
27. Cao Y, Luo J-L, Karin M. I kappa B kinase alpha kinase activity is required for self-renewal of ErbB2/ Her2-transformed mammary tumor-initiating cells. *Proc Natl Acad Sci U S A*. National Academy of Sciences; 2007;104: 15852–7. doi: [10.1073/pnas.0706728104](https://doi.org/10.1073/pnas.0706728104) PMID: [17890319](https://pubmed.ncbi.nlm.nih.gov/17890319/)
28. Hafeez B Bin, Jamal MS, Fischer JW, Mustafa A, Verma AK. Plumbagin, a plant derived natural agent inhibits the growth of pancreatic cancer cells in vitro and in vivo via targeting EGFR, Stat3 and NF- $\kappa$ B signaling pathways. *Int J cancer*. NIH Public Access; 2012;131: 2175–86. doi: [10.1002/ijc.27478](https://doi.org/10.1002/ijc.27478) PMID: [22322442](https://pubmed.ncbi.nlm.nih.gov/22322442/)
29. Wang T, Wu F, Jin Z, Zhai Z, Wang Y, Tu B, et al. Plumbagin inhibits LPS-induced inflammation through the inactivation of the nuclear factor-kappa B and mitogen activated protein kinase signaling pathways in RAW 264.7 cells. *Food Chem Toxicol*. 2014;64: 177–183. doi: [10.1016/j.fct.2013.11.027](https://doi.org/10.1016/j.fct.2013.11.027) PMID: [24296134](https://pubmed.ncbi.nlm.nih.gov/24296134/)
30. Ahmad A, Banerjee S, Wang Z, Kong D, Sarkar FH. Plumbagin-induced apoptosis of human breast cancer cells is mediated by inactivation of NF-kappaB and Bcl-2. *J Cell Biochem*. 2008;105: 1461–1471. doi: [10.1002/jcb.21966](https://doi.org/10.1002/jcb.21966) PMID: [18980240](https://pubmed.ncbi.nlm.nih.gov/18980240/)
31. Shih Y-W, Lee Y-C, Wu P-F, Lee Y-B, Chiang T-A. Plumbagin inhibits invasion and migration of liver cancer HepG2 cells by decreasing productions of matrix metalloproteinase-2 and urokinase- plasminogen activator. *Hepatol Res*. 2009;39: 998–1009. doi: [10.1111/j.1872-034X.2009.00540.x](https://doi.org/10.1111/j.1872-034X.2009.00540.x) PMID: [19624766](https://pubmed.ncbi.nlm.nih.gov/19624766/)
32. Shieh JM, Chiang TA, Chang WT, Chao CH, Lee YC, Huang GY, et al. Plumbagin inhibits TPA-induced MMP-2 and u-PA expressions by reducing binding activities of NF- $\kappa$ B and AP-1 via ERK signaling pathway in A549 human lung cancer cells. *Mol Cell Biochem*. Springer US; 2010;335: 181–193. doi: [10.1007/s11010-009-0254-7](https://doi.org/10.1007/s11010-009-0254-7) PMID: [19768635](https://pubmed.ncbi.nlm.nih.gov/19768635/)

33. Joo MK, Park J-J, Kim SH, Yoo HS, Lee BJ, Chun HJ, et al. Antitumorigenic effect of plumbagin by induction of SH2-containing protein tyrosine phosphatase 1 in human gastric cancer cells. *Int J Oncol*. 2015;46: 2380–8. doi: [10.3892/ijo.2015.2935](https://doi.org/10.3892/ijo.2015.2935) PMID: [25815436](https://pubmed.ncbi.nlm.nih.gov/25815436/)
34. Liu X, Cai W, Niu M, Chong Y, Liu H, Hu W, et al. Plumbagin induces growth inhibition of human glioma cells by downregulating the expression and activity of FOXM1. *J Neurooncol*. 2015;121: 469–77. doi: [10.1007/s11060-014-1664-2](https://doi.org/10.1007/s11060-014-1664-2) PMID: [25528634](https://pubmed.ncbi.nlm.nih.gov/25528634/)
35. Sung B, Oyajobi B, Aggarwal BB, Roodman G, Coleman R, Guise T, et al. Plumbagin inhibits osteoclastogenesis and reduces human breast cancer-induced osteolytic bone metastasis in mice through suppression of RANKL signaling. *Mol Cancer Ther. Molecular Cancer Therapeutics*; 2012;11: 350–9. doi: [10.1158/1535-7163.MCT-11-0731](https://doi.org/10.1158/1535-7163.MCT-11-0731) PMID: [22090419](https://pubmed.ncbi.nlm.nih.gov/22090419/)
36. Li Z, Xiao J, Wu X, Li W, Yang Z, Xie J, et al. Plumbagin inhibits breast tumor bone metastasis and osteolysis by modulating the tumor-bone microenvironment. *Curr Mol Med*. 2012;12: 967–81. Available: <http://www.ncbi.nlm.nih.gov/pubmed/22574935> doi: [10.2174/156652412802480871](https://doi.org/10.2174/156652412802480871) PMID: [22574935](https://pubmed.ncbi.nlm.nih.gov/22574935/)
37. Sandur SK, Ichikawa H, Sethi G, Ahn KS, Aggarwal BB. Plumbagin (5-Hydroxy-2-methyl-1,4-naphthoquinone) Suppresses NF- $\kappa$ B Activation and NF- $\kappa$ B-regulated Gene Products Through Modulation of p65 and I $\kappa$ B Kinase Activation, Leading to Potentiation of Apoptosis Induced by Cytokine and Chemotherapeutic Agents. *J Biol Chem. American Society for Biochemistry and Molecular Biology*; 2006;281: 17023–17033. doi: [10.1074/jbc.M601595200](https://doi.org/10.1074/jbc.M601595200) PMID: [16624823](https://pubmed.ncbi.nlm.nih.gov/16624823/)
38. Ahmad A, Banerjee S, Wang Z, Kong D, Sarkar FH. Plumbagin-induced apoptosis of human breast cancer cells is mediated by inactivation of NF- $\kappa$ B and Bcl-2. *J Cell Biochem*. 2008;105: 1461–1471. doi: [10.1002/jcb.21966](https://doi.org/10.1002/jcb.21966) PMID: [18980240](https://pubmed.ncbi.nlm.nih.gov/18980240/)
39. Garcia-Pineres AJ, Castro V, Mora G, Schmidt TJ, Strunck E, Pahl HL, et al. Cysteine 38 in p65/NF- $\kappa$ B Plays a Crucial Role in DNA Binding Inhibition by Sesquiterpene Lactones. *J Biol Chem. American Society for Biochemistry and Molecular Biology*; 2001;276: 39713–39720. doi: [10.1074/jbc.M101985200](https://doi.org/10.1074/jbc.M101985200) PMID: [11500489](https://pubmed.ncbi.nlm.nih.gov/11500489/)
